# Supplementary material for: Prehospital management of exertional heat stroke at sports competitions: International Olympic Committee Adverse Weather Impact Expert Working Group for the Olympic Games Tokyo 2020
Source: HighWire-hosted journal article supplement (doi:10.1136/bjsports-2020-103854), 2021-04-22
Supplement: bjsports-2020-103854supp002_data_supplement.pdf [file bjsports-2020-103854supp002_data_supplement.pdf]

Appendix 2: Sample medical record template for exertional heat stroke (Modified from Falmouth Road Race).

### Exertional Heat Stroke Medical Record

Treatment Location:

Name:  Sex (Circle one)  M  F Age:

Time Triage:  Time Released:  Bib/Uniform Number:

Triage MD: \_\_\_\_\_ Triage Nurse (Record Keeper): \_\_\_\_\_

---

**Mental Status**  Awake/Alert  Confused  Obtunded  Unresponsive  
**Skin**  Normal  Pale  Cyanotic  Warm  Cool  Dry  Wet  
**Symptoms**  Headache  Vision changes  Chest pain  Palpitations  Nausea  Abdominal pain  
 Vomiting  Diarrhea  Muscle cramps

|    | Cooling Method   | Time | Rectal temp. (°C) | Blood pressure | Heart rate | GCS | Notes |
|----|------------------|------|-------------------|----------------|------------|-----|-------|
| 1  | CWI • RIT • None |      |                   |                |            |     |       |
| 2  | CWI • RIT • None |      |                   |                |            |     |       |
| 3  | CWI • RIT • None |      |                   |                |            |     |       |
| 4  | CWI • RIT • None |      |                   |                |            |     |       |
| 5  | CWI • RIT • None |      |                   |                |            |     |       |
| 6  | CWI • RIT • None |      |                   |                |            |     |       |
| 7  | CWI • RIT • None |      |                   |                |            |     |       |
| 8  | CWI • RIT • None |      |                   |                |            |     |       |
| 9  | CWI • RIT • None |      |                   |                |            |     |       |
| 10 | CWI • RIT • None |      |                   |                |            |     |       |
| 11 | CWI • RIT • None |      |                   |                |            |     |       |
| 12 | CWI • RIT • None |      |                   |                |            |     |       |
| 13 | CWI • RIT • None |      |                   |                |            |     |       |
| 14 | CWI • RIT • None |      |                   |                |            |     |       |
| 15 | CWI • RIT • None |      |                   |                |            |     |       |

At the end of cooling

Abbreviations: CWI= cold water immersion, RIT= rotating ice towel, None= pre and post-cooling values

**Past Medical History**

Tobacco  Previous heat illness  Diabetes  Seizures/Epilepsy  
 Alcohol  Heart disease  Allergy  Other  
 Hypertension

**Fluid Intake History**

Drank before  Drank during

**Medications**

Yes  No Known drug allergies: \_\_\_\_\_

**Triage Decisions:**  
 CWI  RIT  Refusal of tx. Signature (MD)  
 Observe  Transfer to: \_\_\_\_\_

Hosokawa Y. v4. 2021.01.30.
